# Supplementary material for: Microcin PDI regulation and proteolytic cleavage are unique among known microcins
Source: PubMed Central journal article supplement (PMC5311971; doi:10.1038/srep42529), 2017-02-16
Supplement: srep42529-s1.pdf [file srep42529-s1.pdf]

## Supplemental Figures

**Figure. S1.** (A) Transcription analysis of the *mccPDI* genes (*mcpI*, *mcpA* and *mcpB*) using qPCR after culture in LB or M9 media. All fold changes are expressed relative to gene expression in LB at 24 hr. <sup>a</sup> $P < 0.05$  when compared to all LB time points and for the 4 and 12 h measurements for culture in M9 media. <sup>b</sup> $P < 0.05$  when compared to all other time points (LB or M9). Statistical significance was assessed using a single-factor ANOVA followed by a Bonferroni multiple comparison test. Error bars = SEM for three independent replicates. (B) Genetic organization of the PDI gene cluster which shows the length of non-coding region between the *mccPDI* genes.

(A)

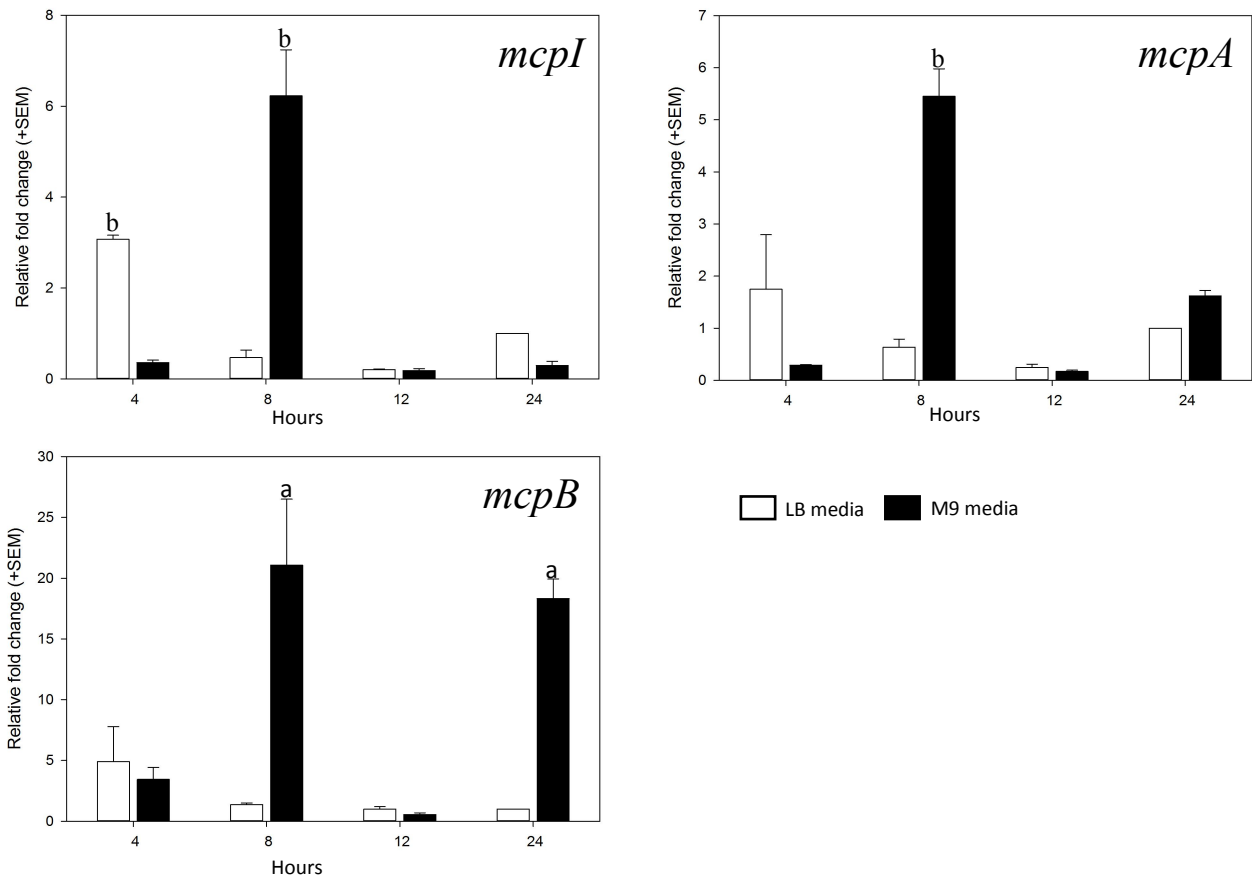

(B)

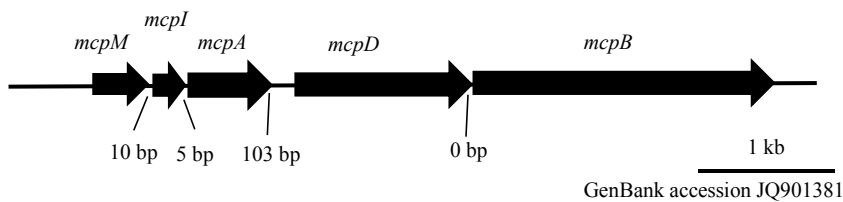

**Figure. S2.** Expression and purification of OmpR and Xenobiotic Responsive Element (XRE) proteins. Briefly, the OmpR and XRE gene were individually cloned into the pPAL7 vector to construct the recombinant plasmids pPAL-OmpR and pPAL-XRE. These were then transformed into *E. coli* BL21 (DE3). These strains were induced in LB for 5 h with 0.2 mM IPTG at room temperature. Induced cells (20 ml cultures) were harvested by centrifugation at 3200×g for 10 min. The pellets were lysed by adding 600 µl of BugBuster master mix (Novagen) for 20 min at room temperature. The soluble fraction was separated by centrifugation at 18,000×g for 15 min, and was then subjected to affinity chromatography using the Profinity eXact purification system following the manufacturer's instructions (Bio-Rad). Samples were assessed using electrophoresis with AnykD TGX precast gels (Bio-Rad). Profinity eXact affinity-tagged proteins are indicated by green arrow while red arrows show the tag-free protein. Lane 1, Precision Plus Protein standards; lane 2, crude lysate from *E. coli* carrying pPAL-OmpR; lane 3, soluble fraction from *E. coli* carrying pPAL-OmpR; lane 4, purified tag-free OmpR; lane 5, crude lysate from *E. coli* carrying pPAL-XRE; lane 6, soluble fraction from *E. coli* carrying pPAL-XRE; lane 7, purified tag-free XRE.

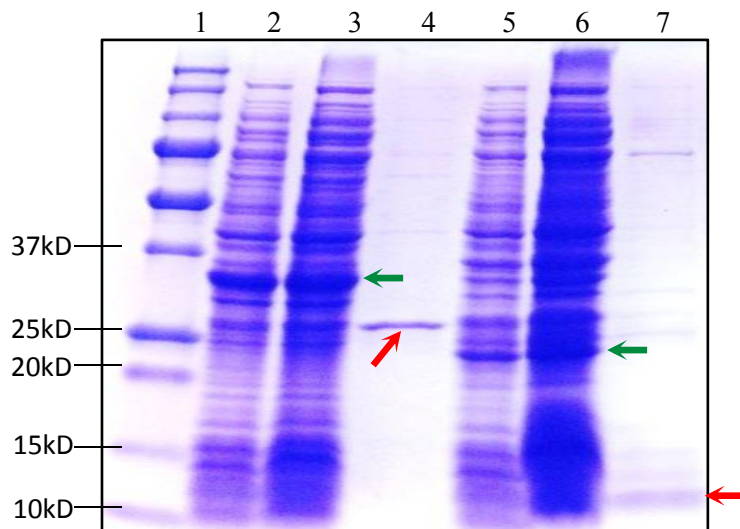

**Figure. S3.** Electrophoretic Gel Mobility shift assay (EMSA). (A) A 270 bp unrelated control DNA fragment (*atpE*), a 201 bp DNA fragment ( $P_{\text{mic-233/-433}}$ ) located at position from -233 bp to -433 bp relative to the start codon of *mcpM*, and a 143 bp DNA fragment ( $P_{\text{micD-20/-163}}$ ) located at position from -20 bp to -163 bp relative to the start codon of *mcpD*, were subjected to EMSA using OmpR expressed and purified from LB both (Fig. S2). No shift was evident for these DNA fragments indicating no evidence that OmpR binds to these regions. (B) A representative gel showing binding of OmpR with  $P_{\text{mic-10/-210}}$  and loss of binding when OmpR was dephosphorylated by using calf intestinal alkaline phosphatase (CIP). 300 ng OmpR was used in this assay.

(A)

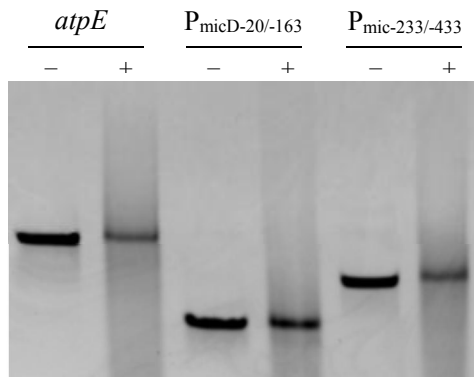

(B)

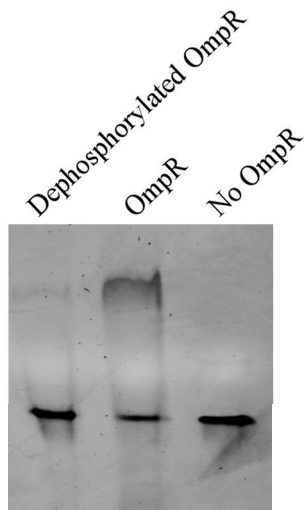

**Figure. S4.** (A) Amino acid sequence alignment of class II microcin precursors. MccS, microcin S (YP\_006954535); ColV, colicin V (CAA40746); MccL microcin L (AAP03989); Mcc24, microcin 24 (AAA88772); MccE492, microcin E492 (AAD04332); MccH47, MchB protein (CAB54534). The red arrows indicate the cleavage sites corresponding to McpM that we identified in this study. The inverted triangles indicate the position of the four cysteines of McpM. Sequence alignments were generated using ClustalX 1.83. Parenthetical numbers on the right indicate the amino acid position relative to the N terminus of each sequence. The black shaded regions indicate completely conserved residues, while the grey shaded regions are partially conserved residues with greater than 60% identity. (B) Western blot analysis of McpM after replacement of specific residues in double-knockout strain *E25ΔmcpMΔmcpA*. (C) Competition assays between the different residue-specific mutants and BW25113 (vector ctrl). Competition was performed in M9 medium with chloramphenicol (34 μg/ml) and 0.5 mM IPTG for 12 h. Results are expressed as the difference in CFUs of the sensitive strain grown in co-culture and monoculture.

(A)

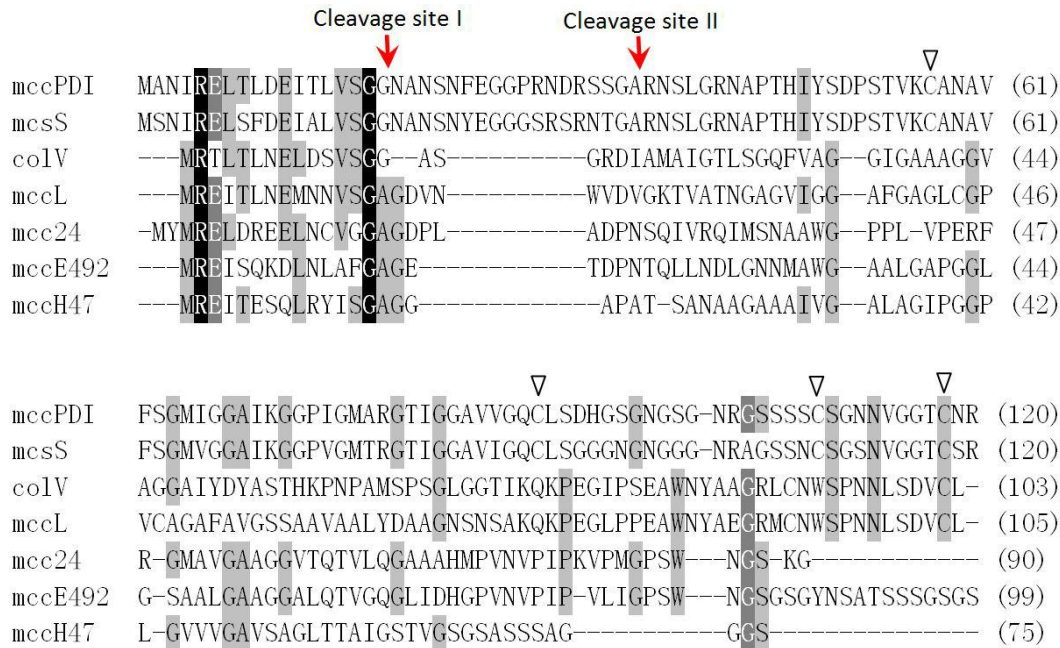

(B)

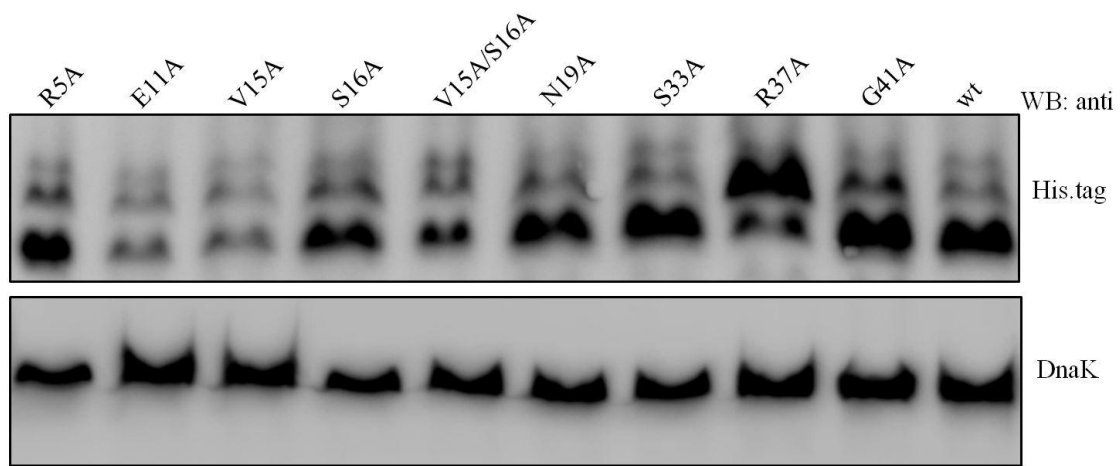

(C)

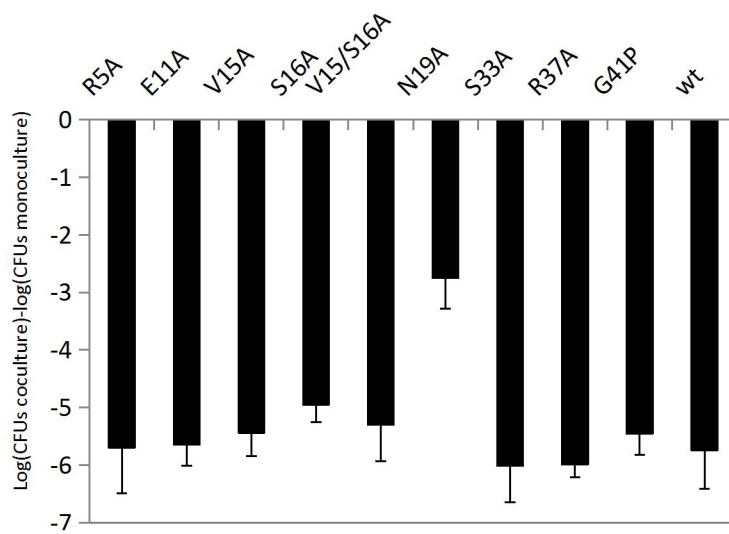

**Figure. S5.** Western blot of McpM from four different constructs ( $\Delta 1-18$ ,  $\Delta 1-36$ ,  $\Delta 19-36$ , and  $\text{colV}_{1-15}/\Delta 19-36$ ) in strain  $\text{E25}\Delta\text{mcpM}\Delta\text{mcpA}$ . Wild-type E25 (McpM producing; wt) was used as positive control. Three bands, indicated by black arrows adjacent to the first lane, correspond to the putative full length McpM (top) followed by two cleaved forms of the protein.

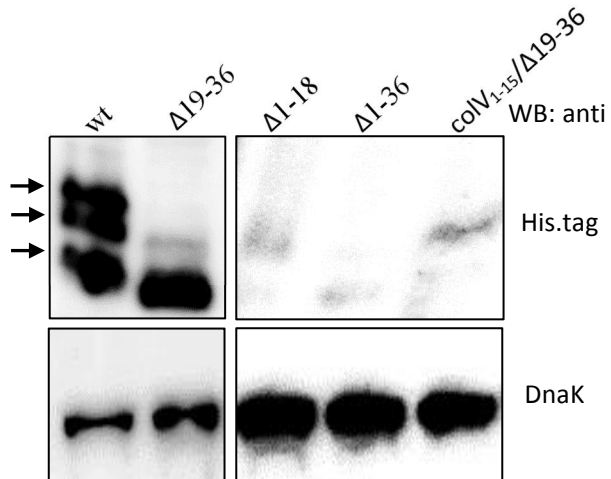

**Figure. S6.** Disulfide bond formation system in *E. coli* is not involved in *mccPDI* activity in producing strains. CFUs of *E. coli* BW25113 following competition with wild-type E25 and different knockouts strains in the E25 background (single and double). Results are expressed as the difference in CFUs of the sensitive strain grown in co-culture and monoculture. Experiments were done in duplicate with error bars representing the standard error of the mean (SEM). \*, statistically significant ANOVA ( $P < 0.01$  with Dunnett's upper one-sided multiple-comparison test with control).

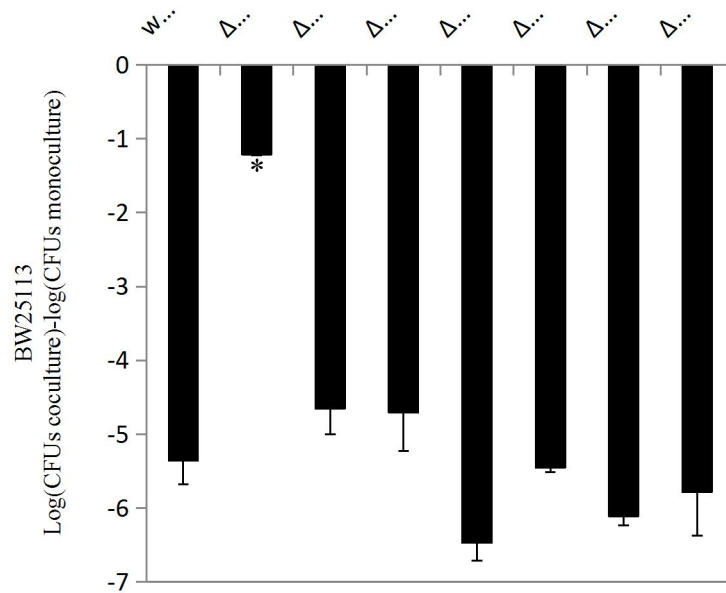





**Supplemental Table S1.** *E. coli* strains used in this study

| Strains name                                                                          | Designation                                                       | Relevant genotype/phenotype                                                                        | Reference           |
|---------------------------------------------------------------------------------------|-------------------------------------------------------------------|----------------------------------------------------------------------------------------------------|---------------------|
| <b><i>E. coli</i>-25</b>                                                              | E25                                                               | Wild type; SSuT <sup>-</sup> PDI <sup>+</sup>                                                      | Sawant et al., 2011 |
| E25 $\Delta$ <i>envZ</i>                                                              | $\Delta$ <i>envZ</i>                                              | SSuT <sup>-</sup> PDI <sup>-</sup> , <i>envZ</i> knockout                                          | This study          |
| E25 $\Delta$ <i>ompR</i>                                                              | $\Delta$ <i>ompR</i>                                              | SSuT <sup>-</sup> PDI <sup>-</sup> , <i>ompR</i> knockout                                          | This study          |
| E25 $\Delta$ <i>envZ</i> (p207:: <i>envZ</i> )                                        | $\Delta$ <i>envZ</i> ( <i>envZ</i> )                              | <i>envZ</i> knockout complemented with <i>envZ</i>                                                 | This study          |
| E25 $\Delta$ <i>envZ</i> (p207:: <i>envZ</i> H243A)                                   | $\Delta$ <i>ompR</i> ( <i>envZ</i> H243A)                         | <i>envZ</i> knockout complemented with mutant <i>envZ</i> (H243A)                                  | This study          |
| E25 $\Delta$ <i>ompR</i> (p207:: <i>ompR</i> )                                        | $\Delta$ <i>ompR</i> ( <i>ompR</i> )                              | <i>envZ</i> knockout complemented with <i>ompR</i>                                                 | This study          |
| E25 $\Delta$ <i>mcpM</i>                                                              | $\Delta$ <i>mcpM</i>                                              | SSuT <sup>-</sup> PDI <sup>-</sup> , <i>mcpM</i> knockout                                          | This study          |
| E25 $\Delta$ <i>mcpM</i> $\Delta$ <i>mcpA</i>                                         | $\Delta$ <i>mcpM</i> & <i>A</i>                                   | SSuT <sup>-</sup> PDI <sup>-</sup> , <i>mcpM</i> and <i>mcpA</i> double-knockout                   | This study          |
| E25 $\Delta$ <i>mcpB</i>                                                              | $\Delta$ <i>mcpB</i>                                              | SSuT <sup>-</sup> PDI <sup>-</sup> , <i>mcpB</i> knockout                                          | This study          |
| E25 $\Delta$ <i>mcpD</i>                                                              | $\Delta$ <i>mcpD</i>                                              | SSuT <sup>-</sup> PDI <sup>-</sup> , <i>mcpD</i> knockout                                          | This study          |
| E25 $\Delta$ <i>mcpM</i> $\Delta$ <i>mcpB</i>                                         | $\Delta$ <i>mcpM</i> & <i>B</i>                                   | SSuT <sup>-</sup> PDI <sup>-</sup> , <i>mcpM</i> and <i>mcpB</i> double-knockout                   | This study          |
| E25 $\Delta$ <i>mcpM</i> $\Delta$ <i>mcpD</i>                                         | $\Delta$ <i>mcpM</i> & <i>D</i>                                   | SSuT <sup>-</sup> PDI <sup>-</sup> , <i>mcpM</i> and <i>mcpD</i> double-knockout                   | This study          |
| E25 $\Delta$ <i>mcpM</i> (p207:: <i>mcpM</i> )                                        | $\Delta$ <i>mcpM</i> ( <i>mcpM</i> )                              | <i>mcpM</i> knockout complemented with <i>mcpM</i> driven by tac promoter                          | This study          |
| E25 $\Delta$ <i>mcpM</i> (pCR2.1:: P <sub>mic-1/-210</sub> <sup>+</sup> <i>mcpM</i> ) | $\Delta$ <i>mcpM</i> (P <sub>mic</sub> <sup>+</sup> <i>mcpM</i> ) | <i>mcpM</i> knockout complemented with <i>mcpM</i> driven by the endogenous promoter               | This study          |
| E25 $\Delta$ <i>mcpB</i> (p207:: <i>mcpB</i> )                                        | $\Delta$ <i>mcpB</i> ( <i>mcpB</i> )                              | <i>mcpB</i> knockout complemented with <i>mcpB</i> driven by tac promoter                          | This study          |
| E25 $\Delta$ <i>mcpD</i> (p207:: <i>mcpD</i> )                                        | $\Delta$ <i>mcpD</i> ( <i>mcpD</i> )                              | <i>mcpM</i> knockout complemented with <i>mcpD</i> driven by tac promoter                          | This study          |
| E25 $\Delta$ <i>mcpM</i> $\Delta$ <i>mcpB</i> (p207:: <i>mcpM</i> )                   | $\Delta$ <i>mcpM</i> & <i>B</i> ( <i>mcpM</i> )                   | <i>mcpM</i> and <i>mcpB</i> double-knockout complemented with <i>mcpM</i> driven by tac promoter   | This study          |
| E25 $\Delta$ <i>mcpM</i> $\Delta$ <i>mcpD</i> (p207:: <i>mcpM</i> )                   | $\Delta$ <i>mcpM</i> & <i>D</i> ( <i>mcpM</i> )                   | <i>mcpM</i> and <i>mcpD</i> double-knockout complemented with <i>mcpM</i> driven by tac promoter   | This study          |
| E25 $\Delta$ <i>mcpM</i> $\Delta$ <i>mcpA</i> (p207:: <i>mcpM</i> R5A)                | $\Delta$ <i>mcpM</i> & <i>A</i> ( <i>mcpM</i> R5A)                | <i>mcpM</i> and <i>mcpA</i> double-knockout complemented with point mutant <i>mcpM</i> (R5A)       | This study          |
| E25 $\Delta$ <i>mcpM</i> $\Delta$ <i>mcpA</i> (p207:: <i>mcpM</i> E11A)               | $\Delta$ <i>mcpM</i> & <i>A</i> ( <i>mcpM</i> E11A)               | <i>mcpM</i> and <i>mcpA</i> double-knockout complemented with point mutant <i>mcpM</i> (E11A)      | This study          |
| E25 $\Delta$ <i>mcpM</i> $\Delta$ <i>mcpA</i> (p207:: <i>mcpM</i> V15A)               | $\Delta$ <i>mcpM</i> & <i>A</i> ( <i>mcpM</i> V15A)               | <i>mcpM</i> and <i>mcpA</i> double-knockout complemented with point mutant <i>mcpM</i> (V15A)      | This study          |
| E25 $\Delta$ <i>mcpM</i> $\Delta$ <i>mcpA</i> (p207:: <i>mcpM</i> S16A)               | $\Delta$ <i>mcpM</i> & <i>A</i> ( <i>mcpM</i> S16A)               | <i>mcpM</i> and <i>mcpA</i> double-knockout complemented with point mutant <i>mcpM</i> (S16A)      | This study          |
| E25 $\Delta$ <i>mcpM</i> $\Delta$ <i>mcpA</i> (p207:: <i>mcpM</i> V15A/S16A)          | $\Delta$ <i>mcpM</i> & <i>A</i> ( <i>mcpM</i> V15A/S16A)          | <i>mcpM</i> and <i>mcpA</i> double-knockout complemented with point mutant <i>mcpM</i> (V15A/S16A) | This study          |
| E25 $\Delta$ <i>mcpM</i> $\Delta$ <i>mcpA</i> (p207:: <i>mcpM</i> G17A)               | $\Delta$ <i>mcpM</i> & <i>A</i> ( <i>mcpM</i> G17A)               | <i>mcpM</i> and <i>mcpA</i> double-knockout complemented with point mutant <i>mcpM</i> (G17A)      | This study          |
| E25 $\Delta$ <i>mcpM</i> $\Delta$ <i>mcpA</i> (p207:: <i>mcpM</i> G18A)               | $\Delta$ <i>mcpM</i> & <i>A</i> ( <i>mcpM</i> G18A)               | <i>mcpM</i> and <i>mcpA</i> double-knockout complemented with point mutant <i>mcpM</i> (G18A)      | This study          |
| E25 $\Delta$ <i>mcpM</i> $\Delta$ <i>mcpA</i> (p207:: <i>mcpM</i> G17A/G18A)          | $\Delta$ <i>mcpM</i> & <i>A</i> ( <i>mcpM</i> G17A/G18A)          | <i>mcpM</i> and <i>mcpA</i> double-knockout complemented with point mutant <i>mcpM</i> (G17/18A)   | This study          |
| E25 $\Delta$ <i>mcpM</i> $\Delta$ <i>mcpA</i> (p207:: <i>mcpM</i> G17P)               | $\Delta$ <i>mcpM</i> & <i>A</i> ( <i>mcpM</i> G17P)               | <i>mcpM</i> and <i>mcpA</i> double-knockout complemented with point mutant <i>mcpM</i> (G17P)      | This study          |
| E25 $\Delta$ <i>mcpM</i> $\Delta$ <i>mcpA</i> (p207:: <i>mcpM</i> G18P)               | $\Delta$ <i>mcpM</i> & <i>A</i> ( <i>mcpM</i> G18P)               | <i>mcpM</i> and <i>mcpA</i> double-knockout complemented with point mutant <i>mcpM</i> (G18P)      | This study          |
| E25 $\Delta$ <i>mcpM</i> $\Delta$ <i>mcpA</i> (p207:: <i>mcpM</i> N19A)               | $\Delta$ <i>mcpM</i> & <i>A</i> ( <i>mcpM</i> N19A)               | <i>mcpM</i> and <i>mcpA</i> double-knockout complemented with point mutant <i>mcpM</i> (N19A)      | This study          |
| E25 $\Delta$ <i>mcpM</i> $\Delta$ <i>mcpA</i> (p207:: <i>mcpM</i> G26P)               | $\Delta$ <i>mcpM</i> & <i>A</i> ( <i>mcpM</i> G26P)               | <i>mcpM</i> and <i>mcpA</i> double-knockout complemented with point mutant <i>mcpM</i> (G26P)      | This study          |
| E25 $\Delta$ <i>mcpM</i> $\Delta$ <i>mcpA</i> (p207:: <i>mcpM</i> G27P)               | $\Delta$ <i>mcpM</i> & <i>A</i> ( <i>mcpM</i> G27P)               | <i>mcpM</i> and <i>mcpA</i> double-knockout complemented with point mutant <i>mcpM</i> (G27P)      | This study          |
| E25 $\Delta$ <i>mcpM</i> $\Delta$ <i>mcpA</i> (p207:: <i>mcpM</i> S33A)               | $\Delta$ <i>mcpM</i> & <i>A</i> ( <i>mcpM</i> S33A)               | <i>mcpM</i> and <i>mcpA</i> double-knockout complemented with point mutant <i>mcpM</i> (S33A)      | This study          |
| E25 $\Delta$ <i>mcpM</i> $\Delta$ <i>mcpA</i> (p207:: <i>mcpM</i> G35P)               | $\Delta$ <i>mcpM</i> & <i>A</i> ( <i>mcpM</i> G35P)               | <i>mcpM</i> and <i>mcpA</i> double-knockout complemented with point mutant <i>mcpM</i> (G35P)      | This study          |
| E25 $\Delta$ <i>mcpM</i> $\Delta$ <i>mcpA</i> (p207:: <i>mcpM</i> A36D)               | $\Delta$ <i>mcpM</i> & <i>A</i> ( <i>mcpM</i> A36D)               | <i>mcpM</i> and <i>mcpA</i> double-knockout complemented with point mutant <i>mcpM</i> (A36D)      | This study          |
| E25 $\Delta$ <i>mcpM</i> $\Delta$ <i>mcpA</i> (p207:: <i>mcpM</i> R37A)               | $\Delta$ <i>mcpM</i> & <i>A</i> ( <i>mcpM</i> R37A)               | <i>mcpM</i> and <i>mcpA</i> double-knockout complemented with point mutant <i>mcpM</i> (R37A)      | This study          |
| E25 $\Delta$ <i>mcpM</i> $\Delta$ <i>mcpA</i> (p207:: <i>mcpM</i> G41P)               | $\Delta$ <i>mcpM</i> & <i>A</i> ( <i>mcpM</i> G41P)               | <i>mcpM</i> and <i>mcpA</i> double-knockout complemented with point mutant <i>mcpM</i> (G41P)      | This study          |
| E25 $\Delta$ <i>mcpM</i> $\Delta$ <i>mcpA</i> (p207:: <i>mcpM</i> C57A)               | $\Delta$ <i>mcpM</i> & <i>A</i> ( <i>mcpM</i> C57A)               | <i>mcpM</i> and <i>mcpA</i> double-knockout complemented with point mutant <i>mcpM</i> (C57A)      | This study          |
| E25 $\Delta$ <i>mcpM</i> $\Delta$ <i>mcpA</i> (p207:: <i>mcpM</i> C90A)               | $\Delta$ <i>mcpM</i> & <i>A</i> ( <i>mcpM</i> C90A)               | <i>mcpM</i> and <i>mcpA</i> double-knockout complemented with point mutant <i>mcpM</i> (C90A)      | This study          |
| E25 $\Delta$ <i>mcpM</i> $\Delta$ <i>mcpA</i> (p207:: <i>mcpM</i> C109A)              | $\Delta$ <i>mcpM</i> & <i>A</i> ( <i>mcpM</i> C109A)              | <i>mcpM</i> and <i>mcpA</i> double-knockout complemented with point mutant <i>mcpM</i> (C109A)     | This study          |
| E25 $\Delta$ <i>mcpM</i> $\Delta$ <i>mcpA</i> (p207:: <i>mcpM</i> C118A)              | $\Delta$ <i>mcpM</i> & <i>A</i> ( <i>mcpM</i> C118A)              | <i>mcpM</i> and <i>mcpA</i> double-knockout complemented with point mutant <i>mcpM</i> (C118A)     | This study          |
| E25 $\Delta$ <i>mcpM</i> $\Delta$ <i>mcpA</i> (p207:: <i>mcpM</i> $\Delta$ 1-18)      | $\Delta$ <i>mcpM</i> & <i>A</i> ( <i>mcpM</i> $\Delta$ 1-18)      | <i>mcpM</i> and <i>mcpA</i> double-knockout complemented with mutant <i>mcpM</i> (1-18 deletion)   | This study          |
| E25 $\Delta$ <i>mcpM</i> $\Delta$ <i>mcpA</i> (p207:: <i>mcpM</i> $\Delta$ 1-36)      | $\Delta$ <i>mcpM</i> & <i>A</i> ( <i>mcpM</i> $\Delta$ 1-36)      | <i>mcpM</i> and <i>mcpA</i> double-knockout complemented with mutant <i>mcpM</i> (1-36 deletion)   | This study          |

|                                                                                                                |                                                                    |                                                                                                                                                                                |                       |
|----------------------------------------------------------------------------------------------------------------|--------------------------------------------------------------------|--------------------------------------------------------------------------------------------------------------------------------------------------------------------------------|-----------------------|
| E25 $\Delta$ <i>mcpM</i> $\Delta$ <i>mcpA</i> (p207:: <i>mcpM</i> $\Delta$ 19-36)                              | $\Delta$ <i>mcpM</i> & <i>A</i> ( <i>mcpM</i> $\Delta$ 19-36)      | <i>mcpM</i> and <i>mcpA</i> double-knockout complemented with mutant <i>mcpM</i> (19-36 deletion)                                                                              | This study            |
| E25 $\Delta$ <i>mcpM</i> $\Delta$ <i>mcpA</i> (p207:: <i>ColV</i> <sub>1-15</sub> + <i>mcpM</i> $\Delta$ 1-18) | $\Delta$ <i>mcpM</i> & <i>A</i> ( <i>ColV</i> 1-15/ $\Delta$ 1-18) | <i>mcpM</i> and <i>mcpA</i> double-knockout complemented with the recombinant <i>mcpM</i> (replacement of the first leader peptide sequence 1-18 by colicin V leader sequence) | This study            |
| E25 $\Delta$ <i>dsbA</i>                                                                                       | $\Delta$ <i>dsbA</i>                                               | SSuT <sup>+</sup> PDI <sup>+</sup> , <i>dsbA</i> knockout                                                                                                                      | This study            |
| E25 $\Delta$ <i>dsbB</i>                                                                                       | $\Delta$ <i>dsbB</i>                                               | SSuT <sup>+</sup> PDI <sup>+</sup> , <i>dsbB</i> knockout                                                                                                                      | This study            |
| E25 $\Delta$ <i>dsbA</i> $\Delta$ <i>dsbB</i>                                                                  | $\Delta$ <i>dsbA</i> & <i>B</i>                                    | SSuT <sup>+</sup> PDI <sup>+</sup> , <i>dsbA</i> and <i>dsbB</i> double-knockout                                                                                               | This study            |
| E25 $\Delta$ <i>dsbD</i>                                                                                       | $\Delta$ <i>dsbD</i>                                               | SSuT <sup>+</sup> PDI <sup>+</sup> , <i>dsbD</i> knockout                                                                                                                      | This study            |
| E25 $\Delta$ <i>dsbA</i> $\Delta$ <i>dsbD</i>                                                                  | $\Delta$ <i>dsbA</i> & <i>D</i>                                    | SSuT <sup>+</sup> PDI <sup>+</sup> , <i>dsbA</i> and <i>dsbD</i> double-knockout                                                                                               | This study            |
| E25 $\Delta$ <i>dsbA</i> $\Delta$ <i>dsbB</i> $\Delta$ <i>dsbD</i>                                             | $\Delta$ <i>dsbA</i> & <i>B</i> & <i>D</i>                         | SSuT <sup>+</sup> PDI <sup>+</sup> , <i>dsbA</i> , <i>dsbB</i> and <i>dsbD</i> triple-knockout                                                                                 | This study            |
| E25 $\Delta$ <i>traM</i> ::Cm                                                                                  | $\Delta$ <i>traM</i> ::Cm                                          | SSuT <sup>+</sup> PDI <sup>+</sup> , <i>traM</i> knockout with a replacement of chloramphenicol cassette                                                                       | Eberhart et al., 2014 |
| E25 $\Delta$ <i>traM</i> ::Kan                                                                                 | $\Delta$ <i>traM</i> ::Kan                                         | SSuT <sup>+</sup> PDI <sup>+</sup> , <i>traM</i> knockout with a replacement of kanamycin cassette                                                                             | Eberhart et al., 2012 |
| <b><i>E. coli</i> BW25113</b>                                                                                  | BW                                                                 | Nal <sup>r</sup> , Keio collection wild-type K-12 strain                                                                                                                       | Baba et al., 2006     |
| BW25113 (pMMB207 only)                                                                                         | BW(vector ctrl)                                                    | Nal <sup>r</sup> Cm <sup>r</sup> , BW25113 with empty pMMB207 vector                                                                                                           | Zhao et al, 2015      |
| BW25113 ( p207:: <i>mcpM</i> )                                                                                 | BW( <i>mcpM</i> )                                                  | Nal <sup>r</sup> Cm <sup>r</sup> , BW25113 with recombinant plasmid p207:: <i>mcpM</i>                                                                                         | This study            |
| <b><i>E. coli</i> 186</b>                                                                                      | 186                                                                | Wild type; Nal <sup>r</sup> PDI <sup>+</sup> , susceptible strain to microcin PDI.                                                                                             | Eberhart et al.,2012  |
| <b>186( p207::<i>mcpM</i>)</b>                                                                                 | 186( <i>mcpM</i> )                                                 | Nal <sup>r</sup> Cm <sup>r</sup> , 186 with recombinant plasmid p207:: <i>mcpM</i>                                                                                             | This study            |
| <b><i>E. coli</i> S17-1 <math>\lambda</math> <i>pir</i></b>                                                    | S17                                                                | <i>thi pro hsdR hsdM<sup>+</sup> recA</i> RP4-2-Tc::Mu-Km::Tn7 $\lambda$ <i>pir</i> lysogen                                                                                    | Simon et al.(1983)    |
| S17:pDM4- $\Delta$ <i>envZ</i> (A1+A2)                                                                         | S17:pDM4- $\Delta$ <i>envZ</i>                                     | S17 strain carrying the plasmid pDM4- $\Delta$ <i>envZ</i>                                                                                                                     | This study            |
| S17:pDM4- $\Delta$ <i>ompR</i> (A1+A2)                                                                         | S17:pDM4- $\Delta$ <i>ompR</i>                                     | S17 strain carrying the plasmid pDM4- $\Delta$ <i>ompR</i>                                                                                                                     | This study            |
| S17:pDM4- $\Delta$ <i>mcpM</i> (A1+A2)                                                                         | S17:pDM4- $\Delta$ <i>mcpM</i>                                     | S17 strain carrying the plasmid pDM4- $\Delta$ <i>mcpM</i>                                                                                                                     | This study            |
| S17:pDM4- $\Delta$ <i>mcpB</i> (A1+A2)                                                                         | S17:pDM4- $\Delta$ <i>mcpB</i>                                     | S17 strain carrying the plasmid pDM4- $\Delta$ <i>mcpB</i>                                                                                                                     | This study            |
| S17:pDM4- $\Delta$ <i>mcpD</i> (A1+A2)                                                                         | S17:pDM4- $\Delta$ <i>mcpD</i>                                     | S17 strain carrying the plasmid pDM4- $\Delta$ <i>mcpD</i>                                                                                                                     | This study            |
| S17:pDM4- $\Delta$ <i>dsbA</i> (A1+A2)                                                                         | S17:pDM4- $\Delta$ <i>dsbA</i>                                     | S17 strain carrying the plasmid pDM4- $\Delta$ <i>dsbA</i>                                                                                                                     | This study            |
| S17:pDM4- $\Delta$ <i>dsbB</i> (A1+A2)                                                                         | S17:pDM4- $\Delta$ <i>dsbB</i>                                     | S17 strain carrying the plasmid pDM4- $\Delta$ <i>dsbB</i>                                                                                                                     | This study            |
| S17:pDM4- $\Delta$ <i>dsbD</i> (A1+A2)                                                                         | S17:pDM4- $\Delta$ <i>dsbD</i>                                     | S17 strain carrying the plasmid pDM4- $\Delta$ <i>dsbD</i>                                                                                                                     | This study            |
| <b><i>E. coli</i> BL21(DE3)</b>                                                                                | BL21                                                               | F <sup>-</sup> <i>ompT hsdS<sub>B</sub>(r<sub>B</sub><sup>-</sup>, m<sub>B</sub><sup>-</sup>) gal dcm</i> (DE3)                                                                | Invitrogen            |
| BL21(DE3):pPAL7- <i>ompR</i>                                                                                   | BL21:pPAL7- <i>ompR</i>                                            | BL21 (DE3) carrying the plasmid pPAL7- <i>ompR</i>                                                                                                                             | This study            |
| BL21(DE3):pPAL7- <i>ompR</i> D55A                                                                              | BL21:pPAL7- <i>ompR</i> D55A                                       | BL21 (DE3) carrying the plasmid pPAL7- <i>ompR</i> D55A                                                                                                                        | This study            |
| BL21(DE3):pPAL7- <i>XRE</i>                                                                                    | BL21:pPAL7- <i>XRE</i>                                             | BL21 (DE3) carrying the plasmid pPAL7- <i>XRE</i>                                                                                                                              | This study            |

## Supplemental Table S2. PCR primers used in this study

| Primer name                                                     | Sequence(5' _3')*                                                                                                                    | Usage                                                                                      |
|-----------------------------------------------------------------|--------------------------------------------------------------------------------------------------------------------------------------|--------------------------------------------------------------------------------------------|
| mcpM_A1_BglII<br>mcpM_A1_R<br>mcpM_A2_F<br>mcpM_A2_Sall         | GGAAGATCTATGGCAATGCTGGAAGAG<br>CATTATTACCATCATATTCCCCTATCGGT<br>GAAATATGATGGTAATAATGTTGGCGGAAC<br>ACGCGTCGACATGAGAGCAATCACAGCAA      | construct suicide plasmid pDM4_Δ <i>mcpM</i> (A1+A2)<br>for mcpM knockout                  |
| mcpM_int_F:<br>mcpM_int_R:                                      | AGATGAGATAACGCTTGTC<br>ACTTCCTCTGTTACCACTTC                                                                                          | confirm mcpM knockout                                                                      |
| mcpM/I_A1_BglII<br>mcpM/I_A1_R<br>mcpM/I_A2_F<br>mcpM/I_A2_Sall | GGAAGATCTATGGCAATGCTGGAAGAG<br>AATCTTGCCGATCATATTCCCCTATCGGT<br>GAAATATGATCGGCAAGATTCATGGACTA<br>ACGCGTCGACCTTCATAATACGGAAGTGTGACG   | construct suicide plasmid pDM4_Δ <i>mcpM/I</i> (A1+A2)<br>for mcpM & mcpI knockout         |
| mcpI_int_F<br>mcpI_int_R                                        | TATGTGGTTTGTACTGGGAT<br>CGCGGAGATTGTCTTATTT                                                                                          | confirm mcpI knockout                                                                      |
| mcpA_A1_SacI<br>mcpA_A1_R<br>mcpA_A2_F<br>mcpA_A2_Sall          | GGAGAGCTCGATGAGATAACGCTTGTCAG<br>AGTTTTATACAATGCTATTCGCGGAGAT<br>AAATAGCATTGTATAAACTTTAACATCACACA<br>ACGCGTCGACGGCTTCTGTGTTGACTA     | construct suicide plasmid pDM4_Δ <i>mcpA</i> (A1+A2) for<br>mcpA knockout                  |
| mcpA_int_F<br>mcpA_int_R                                        | CGGCATTACCATACAATA<br>CATAATACGGAAGTGTGACG                                                                                           | confirm mcpA knockout                                                                      |
| mcpD_A1_SacI<br>mcpD_A1_R<br>mcpD_A2_F<br>mcpD_A2_Sall          | GGAGAGCTCTTGCTGTGATTGCTCTCAT<br>ACAGATTTCCAAGTAACCTTCCGTCAACA<br>AAGGTTACTTGGAAATCTGTAATGGAATCA<br>ACGCGTCGACTCACTGGCTGGAGTTAATTC    | construct suicide plasmid pDM4_Δ <i>mcpD</i> (A1+A2) for<br>mcpA knockout                  |
| mcpD_int_F<br>mcpD_int_R                                        | TCAACAACAGGAAGCCATA<br>AAGGAGCCAGAGTCGTAT                                                                                            | confirm mcpD knockout                                                                      |
| mcpB_A1_SacI<br>mcpB_A1_R<br>mcpB_A2_F<br>mcpB_A2_Sall          | GGAGAGCTCCAATGGACACAGCCAAAGA<br>GCGGATGCTATACAGATTTCCCTTCATGCTCC<br>GAAATCTGTATAGCATCCGCAGACAGAGTT<br>ACGCGTCGACACCCGTTGATTTATGTGAGA | construct suicide plasmid pDM4_Δ <i>mcpB</i> (A1+A2) for<br>mcpA knockout                  |
| mcpB_int_F<br>mcpB_int_R                                        | CCATTTTCGTCGTTCTCCATA<br>TTGCCACATCCTGATTTACC                                                                                        | confirm mcpB knockout                                                                      |
| mcpM_p207_EcoRI<br>mcpM_p207_Sall                               | CCGGAATTCATGGCAAATATAAGAGA<br>ACGCGTCGACTTAATGGTGATGGTGATGATGTCGGTTACATGTTCCGCCA                                                     | construct recombinant plasmid p207::mcpM for<br>mcpM expression under tac promoter control |
| mcpD_p207_SacI<br>mcpD_p207_Sall                                | GGAGAGCTCATGAATATATTCAGAAGTGA<br>ACGCGTCGACTTAATGGTGATGGTGATGATGCAGATTTCCCTTCATGCTCCA                                                | construct recombinant plasmid p207::mcpD for mcpD<br>expression under tac promoter control |
| mcpB_p207_EcoRI<br>mcpB_p207_Sall                               | GGAGAGCTCATGGAATCAATAAACTGGA<br>GCAGGTCGACTCAATGGTGATGGTGATGATGCCTCCTGTTGGGGTGATTA                                                   | construct recombinant plasmid p207::mcpB for mcpB<br>expression under tac promoter control |

|                                              |                                                                                                                                                |                                                                                                                                                                                                                     |
|----------------------------------------------|------------------------------------------------------------------------------------------------------------------------------------------------|---------------------------------------------------------------------------------------------------------------------------------------------------------------------------------------------------------------------|
| Δ1-18_p207_EcoRI<br>Δ1-18_p207_Sall          | CCGGAATTCATGAACGCAAACAGCAACTTTGA<br>ACGCGTCGACTTAATGGTGATGGTGATGATGTCGGTTACATGTTCCGCCA                                                         | construct recombinant plasmid<br>p207:: <i>mcpM</i> Δ1-18for mutant <i>mcpM</i> expression (1-18 deletion) under tac promoter control                                                                               |
| Δ1-36_p207_EcoRI<br>Δ1-36_p207_Sall          | CCGGAATTCATGCGTAACTCACTGGGTCGAA<br>ACGCGTCGACTTAATGGTGATGGTGATGATGTCGGTTACATGTTCCGCCA                                                          | construct recombinant plasmid<br>p207:: <i>mcpM</i> Δ1-36 for mutant <i>mcpM</i> expression (1-36 deletion) under tac promoter control                                                                              |
| Δ19-36_p207_EcoRI<br>Δ19-36_p207_Sall        | CCGGAATTCATGGCAAATATAAGAGAATTAACCTTTAGATGAGATAACGCTTGTCAGCGGAGGAC<br>GTAACCTCACTGGGTCGAA<br>ACGCGTCGACTTAATGGTGATGGTGATGATGTCGGTTACATGTTCCGCCA | construct recombinant plasmid<br>p207:: <i>mcpM</i> Δ19-36 for mutant <i>mcpM</i> expression (19-36 deletion) under tac promoter control                                                                            |
| ColV1-15/Δ1-18_p207_EcoRI<br>Δ1-18_p207_Sall | CCGGAATTCATGAGAAGCTCTGACTCTAAATGAATTAGATTCTGTTTCTGGTGGTAACGCAAACAG<br>CAACTTTGA<br>ACGCGTCGACTTAATGGTGATGGTGATGATGTCGGTTACATGTTCCGCCA          | construct recombinant plasmid<br>p207::ColV <sub>1-15</sub> + <i>mcpM</i> <sub>Δ1-18</sub> for the recombinant <i>mcpM</i> (replacement of <i>mcpM</i> 1-18 by colicin V leader sequence under tac promoter control |
| R5A_F<br>R5A_R                               | TGGCAAATATagcaGAATTAACCTTTAGATGAG<br>TGAATTCIGTTCCCTGTGTG                                                                                      | generate the replacement of R5 by alanine in the p207:: <i>mcpM</i>                                                                                                                                                 |
| E11A_F<br>E11A_R                             | AACTTTAGATgcgATAACGCTTGTC<br>AATTCTCTTATATTTGCCATGAATTC                                                                                        | generate the replacement of E11 by alanine in the p207:: <i>mcpM</i>                                                                                                                                                |
| V15A_F<br>V15A_R                             | GATAACGCTTgccAGCGGAGGAA<br>TCATCTAAAGTTAATTCTCTTATATTTGCC                                                                                      | generate the replacement of V15 by alanine in the p207:: <i>mcpM</i>                                                                                                                                                |
| S16A_F<br>S16A_R                             | TAACGCTTGTCgccGGAGGAAACG<br>TCTCATCTAAAGTTAATTCTCTTATATTTG                                                                                     | generate the replacement of S16 by alanine in the p207:: <i>mcpM</i>                                                                                                                                                |
| V15/S16A_F<br>V15/S16A_R                     | GATAACGCTTgccgccGGAGGAAACG<br>TCATCTAAAGTTAATTCTCTTATATTTG                                                                                     | generate the replacement of V15 and S16 by alanine in the p207:: <i>mcpM</i>                                                                                                                                        |
| G17A_F<br>G17A_R                             | GCTTGTCAGCgcaGAAACGCAA<br>GTTATCTCATCTAAAGTTAATTCTCTTATATTTGC                                                                                  | generate the replacement of G17 by alanine in the p207:: <i>mcpM</i>                                                                                                                                                |
| G18A_F<br>G18A_R                             | TGTCAGCGGagcaAACGCAAACA<br>AGCGTTATCTCATCTAAAGTTAATTCTC                                                                                        | generate the replacement of G18 by alanine in the p207:: <i>mcpM</i>                                                                                                                                                |
| G17/18A_F<br>G17/18A_R                       | GCTTGTCAGCgcagcaAACGCAAACA<br>GTTATCTCATCTAAAGTTAATTCTCTTATATTTG                                                                               | generate the replacements of G17 and G18 by alanine in the p207:: <i>mcpM</i>                                                                                                                                       |
| G17P_F<br>G17P_R                             | CGCTTGTCAGcccaGAAACGCAA<br>TTATCTCATCTAAAGTTAATTCTCTTATATTTG                                                                                   | generate the replacement of G17 by proline in the p207:: <i>mcpM</i>                                                                                                                                                |
| G18P_F<br>G18P_R                             | TTGTCAGCGgaccaAACGCAAACAG<br>GCGTTATCTCATCTAAAGTTAATTC                                                                                         | generate the replacement of G18 by proline in the p207:: <i>mcpM</i>                                                                                                                                                |
| N19A_F<br>N19A_R                             | TCAGCGGAGgagccGCAAACAGCA<br>CAAGCGTTATCTCATCTAAAGTTAATTC                                                                                       | generate the replacements of N19 by alanine in the p207:: <i>mcpM</i>                                                                                                                                               |
| G26P_F<br>G26P_R                             | CAACTTTGAAccaGGCCCCCGTA<br>CTGTTTGCCTTTCCTCCG                                                                                                  | generate the replacement of G26 by proline in the p207:: <i>mcpM</i>                                                                                                                                                |
| G27P_F<br>G27P_R                             | CTTTGAAGGTcccCCCCGTAATG<br>TTGCTGTTTGCCTTTCCTC                                                                                                 | generate the replacement of G27 by proline in the p207:: <i>mcpM</i>                                                                                                                                                |
| S33A_F<br>S33A_R                             | TAATGACCGTgccgetGGGGCTCGTAACTCAC<br>CGGGGGCCACCTTCAAAG                                                                                         | generate the replacement of S33 by alanine in the p207:: <i>mcpM</i>                                                                                                                                                |
| G35P_F<br>G35P_R                             | ACCGTTCCAGtcgcGCTCGTAACTC<br>CATTACGGGGGCCACCTT                                                                                                | generate the replacement of G35 by proline in the p207:: <i>mcpM</i>                                                                                                                                                |
| A36D_F<br>A36D_R                             | CCGTTCCAGTgaggatCGTAACTCAC<br>TCATTACGGGGGCCACCT                                                                                               | generate the replacement of A36 by aspartic acid in the p207:: <i>mcpM</i>                                                                                                                                          |

|                                                        |                                                                                                                                   |                                                                                          |
|--------------------------------------------------------|-----------------------------------------------------------------------------------------------------------------------------------|------------------------------------------------------------------------------------------|
| R37A_F<br>R37A_R                                       | CCAGTGGGGCtgcTAACTACTGGGTC<br>AACGGTCATTACGGGGGC                                                                                  | generate the replacement of A36 by alanine in the p207:: <i>mcpM</i>                     |
| G41P_F<br>G41P_R                                       | GTAACTCACTgcctCGAAACGCACCAACTCATATTTATAG<br>GAGCCCCACTGGAACGGT                                                                    | generate the replacement of G41 by alanine in the p207:: <i>mcpM</i>                     |
| C57A_F<br>C57A_R                                       | GCACTGTAAAagccGCTAACGCTG<br>TTGGATCACTATAAAATATGAGTTG                                                                             | generate the replacement of C57 by alanine in the p207:: <i>mcpM</i>                     |
| C90A_F<br>C90A_R                                       | TTGTTGGTCAagctCCTCAGATCATGGTAGTGG<br>CGGCTCCACCAATGGTAC                                                                           | generate the replacement of C90 by alanine in the p207:: <i>mcpM</i>                     |
| C109A_F<br>C109A_R                                     | GTTCCAGTAGtctTCAGGTAATAATGTTGGC<br>TTCTCTGTTACCCTTC                                                                               | generate the replacement of C109 by alanine in the p207:: <i>mcpM</i>                    |
| C118A_F<br>C118A_R                                     | TTGGCGGAACagctAACCGACATCATC<br>CATTATTACCTGAACAACACTCTG                                                                           | generate the replacement of C118 by alanine in the p207:: <i>mcpM</i>                    |
| envZ_A1_SacI<br>envZ_A1_R<br>envZ_A2_F<br>envZ_A2_Sall | GGAGAGCTCGCTGACGACTACATTCCAA<br>ATTACCCTTGTGACGATGAGCAATAACG<br>TCATCGTCACAAGGGTAAATAAACGGGAGG<br>ACGCGTCGACGGCATTGAAACTATTGTCAGA | construct suicide plasmid pDM4_Δ <i>envZ</i> (A1+A2) for envZ knockout                   |
| ompR_A1_SacI<br>ompR_A1_R<br>ompR_A2_F<br>ompR_A2_Sall | GGAGAGCTCATTTACGCAGACGCTTT<br>CACCATGCGGGACCACCAGAATCTTGTAGT<br>TCTGGTGGTCCCGCATGGTGGAAAGAAGA<br>ACGCGTCGACCAGACGACAGGCGAACTT     | construct suicide plasmid pDM4_Δ <i>ompR</i> (A1+A2) for envZ knockout                   |
| envZ_207_SacI<br>envZ_207_Sall                         | GGAGAGCTCATGAGGCGATTGCGCTTCTC<br>ACGCGTCGACTTAATGGTGATGGTGATGATGCCCTTCTTTGTCGTGCCCTG                                              | construct recombinant plasmid p207::envZ for envZ expression under tac promoter control  |
| envZ_H243A_F<br>envZ_H243A_R                           | CGGGGGTAAgTgccGACTTGCAC<br>CCATCAGCAGCGTGCGGT                                                                                     | generate the replacement of H243 by alanine in the p207:: <i>envZ</i>                    |
| ompR_207_SacI<br>ompR_207_Sall                         | GGAGAGCTCATGCAAGAGAACTACAAGA<br>ACGCGTCGACTCAATGGTGATGGTGATGATGCTTTAGAGCCGTCCGGT                                                  | construct recombinant plasmid p207::ompR for ompR expression under tac promoter control  |
| ompR_PAL_SpeI<br>ompR_PAL_EcoRI                        | TTTGACTAGTATGCAAGAGAACTACAAGA<br>CTGCGAATTC TCAATGGTGATGGTGATGATGCTTTAGAGCCGTCCGGT                                                | construct recombinant plasmid pPAL7::ompR for ompR expression under tac promoter control |
| ompR_D55A_F<br>ompR_D55A_R                             | TTATGGTACTggctTTAATGTTACC<br>GATGAAAAGATTCACGAGTC                                                                                 | generate the replacement of D55 by alanine in the pPAL7::ompR                            |
| XRE_PAL_SpeI<br>XRE_PAL_EcoRI                          | TTTGACTAGTATGAAAGATGAATTATTGCT<br>CTGCGAATTC TTAATGGTGATGGTGATGATGGATTGTTTTCAATTGATTGAT                                           | construct recombinant plasmid pPAL7::XRE for XRE expression under tac promoter control   |
| atpA_A1_SacI<br>atpA_A1_R<br>atpA_A2_F<br>atpA_A2_Sall | GGAGAGCTCGTCGTTATCGCAGTTTGT<br>TCGAGGATGCTAACACCGCTCACTACAGAA<br>GACGGTGTTAGCATCCTCGATTCTCTCAA<br>ACGCGTCGACTCGGTCCAGGTCTTCATT    | construct suicide plasmid pDM4_Δ <i>atpA</i> (A1+A2) for atpA knockout                   |
| atpF_A1_SacI<br>atpF_A1_R<br>atpF_A2_F<br>atpF_A2_Sall | GGAGAGCTCTCTGATTGCTGGTCTGTTG<br>AGCGACAAGTCCGAGGATTGTTGCGTTA<br>CAATCCTCGGACTTGTGCTGACTGAACTGTA<br>ACGCGTCGACATGATAACGCCTGCCATTA  | construct suicide plasmid pDM4_Δ <i>atpF</i> (A1+A2) for atpA knockout                   |
| dsbA_A1_SacI<br>dsbA_A1_R<br>dsbA_A2_F<br>dsbA_A2_Sall | GGAGAGCTCGCGACAGATGAGCTGATT<br>CAGCATACTGCTCTCCGATTAATACATAGGTG<br>AATCGGAGAGCAGTATGCTGATACAGTGAA<br>ACGCGTCGACTGCTCAACATCCACATCA | construct suicide plasmid pDM4_Δ <i>dsbA</i> (A1+A2) for dsbA knockout                   |

|                                                        |                                                                                                                                    |                                                                                                                                 |
|--------------------------------------------------------|------------------------------------------------------------------------------------------------------------------------------------|---------------------------------------------------------------------------------------------------------------------------------|
| dsbB_A1_SacI<br>dsbB_A1_R<br>dsbB_A2_F<br>dsbB_A2_Sall | GGAGAGCTCGGTCTGCTGTCATCCATT<br>TAAGCGATAAGCCTTGTGAACATTGGTT<br>TTCACAAGGCTTATCGCTTACCTGATTGTC<br>ACGCGTCGACATATCATTAAACGCTGCTACG   | construct suicide plasmid pDM4_Δ <i>dsbB</i> (A1+A2) for <i>dsbB</i> knockout                                                   |
| ompF_A1_SacI<br>ompF_A1_R<br>ompF_A2_F<br>ompF_A2_Sall | GGAGAGCTCTGGCATTCTGGATGTCTG<br>ATTAGAAGTGCAGTACCTGCTACTAACAGA<br>GCAGGTAAGTGCAGTTCTAATAGCACACCTCT<br>ACGCGTCGACAACAGCAGTTCCCTGAGTG | construct suicide plasmid pDM4_Δ <i>ompF</i> (A1+A2) for <i>ompF</i> knockout                                                   |
| dsbD_A1_SacI<br>dsbD_A1_R<br>dsbD_A2_F<br>dsbD_A2_Sall | GGAGAGCTCCGCCGACTAACATCCTTC<br>GTCGGTAGGCTTGAGCCATGAGAGGTAATC<br>CATGGCTCAAGCCTACCGACAATTCTCTT<br>ACGCGTCGACTCCGATAACGCCTGATAAC    | construct suicide plasmid pDM4_Δ <i>dsbD</i> (A1+A2) for <i>dsbD</i> knockout                                                   |
| Pmic_-210_F<br>Pmic_-10_R                              | TGGAACGAGATGTAAGTAA<br>CCCTATCGGTTGTTTGTAT                                                                                         | amplify the promoter of <i>mccPDI</i> (Pmic) using PCR                                                                          |
| Pmic_-210_F<br>Pmic_-35_R                              | TGGAACGAGATGTAAGTAA<br>TGCGTTCAAGATAGCCAATA                                                                                        | amplify the fragment 1 of Pmic using PCR                                                                                        |
| Pmic_-210_F<br>Pmic_-61_R                              | TGGAACGAGATGTAAGTAA<br>ATGTAATGAAAGTAAAATTGT                                                                                       | amplify the fragment 2 of Pmic using PCR                                                                                        |
| Pmic_-210_F<br>Pmic_-81_R                              | TGGAACGAGATGTAAGTAA<br>TGTGATTAATGTAATATGTG                                                                                        | amplify the fragment 3 of Pmic using PCR                                                                                        |
| Pmic_-210_F<br>Pmic_-99_R                              | TGGAACGAGATGTAAGTAA<br>TGTGAAAAAATTTGTATGT                                                                                         | amplify the fragment 4 of Pmic using PCR                                                                                        |
| Pmic_-210_F<br>Pmic_-116_R                             | TGGAACGAGATGTAAGTAA<br>GTTTTCGAGGTTGTGTAAT                                                                                         | amplify the fragment 5 of Pmic using PCR                                                                                        |
| Pmic_-134_F<br>Pmic_-10_R                              | ATTACACAACCTCGAAAAC<br>CCCTATCGGTTGTTTGTAT                                                                                         | amplify the fragment 6 of Pmic using PCR                                                                                        |
| Pmic_-117_F<br>Pmic_-10_R                              | ACATACAAATTTTTTCACA<br>CCCTATCGGTTGTTTGTAT                                                                                         | amplify the fragment 7 of Pmic using PCR                                                                                        |
| Pmic_-102_F<br>Pmic_-10_R                              | CACATATTTACATTTAATCACA<br>CCCTATCGGTTGTTTGTAT                                                                                      | amplify the fragment 8 of Pmic using PCR                                                                                        |
| Pmic_-35/-84_F<br>Pmic_-35/-84_R                       | TCACACAATTTCACTTTTACATTTTGTATTGGCTATCTGAACGCA<br>TGCGTTCAAGATAGCCAATAACAAAAATGTAATGAAAGTAAAATTGTGTGA                               | generate the fragment 9 of Pmic using PCR                                                                                       |
| Pmic_-61/-110_F<br>Pmic_-61/-110_R                     | AATTTTTTCACATATTTACATTTAATCACACAATTTCACTTTTACAT<br>ATGTAATGAAAGTAAAATTGTGTGATTAATGTAATATGTGAAAAAAT                                 | generate the fragment 10 of Pmic using PCR                                                                                      |
| Pmic_-433_F<br>Pmic_-233_R                             | GGGAAACAGCGGTGAATA<br>GATGAAACCAGTTTACAGGAC                                                                                        | amplify DNA fragment located at position from -233 bp to -433bp relative to the start codon of <i>mcpM</i> gene (Pmic-233/-433) |
| PmicD_-163_F<br>PmicB_-20_R                            | CTATCCAATGCTGTTACATGC<br>ACCTTTCCGTCAACAAGAG                                                                                       | amplify DNA fragment located at position from -20 bp to -163 bp relative to the start codon of <i>mcpD</i> gene (PmicD-20/-163) |
| atpE-F<br>atpE-R                                       | CCGGAATTCATGGAAAACCTGAATATGGA<br>CGCGTCGACCTAATGGTGATGGTGATGATGCGCGACAGCGAACATCACGTA                                               | amplify <i>atpE</i> gene as control                                                                                             |
| pCR2.1_Pmic_F<br>pCR2.1_mcpM_Sall                      | TGGAACGAGATGTAAGTAA<br>ACGCGTCGACTTAATGGTGATGGTGATGATGTCGGTTACATGTTCCGCCA                                                          | construct recombinant plasmid pCR::Pmic+mcpM for <i>mcpM</i> expression under the endogenous promoter                           |

|                            |                                              |                                                                                                       |
|----------------------------|----------------------------------------------|-------------------------------------------------------------------------------------------------------|
| qPCR_mcpA_F<br>qPCR_mcpA_R | AGCCGTTTATTCCCGCATGT<br>GCCTGATGCATCCGCAGTAT | Measure transcription of <i>mcpA</i> using quantitative PCR under different conditions and timepoints |
| qPCR_mcpB_F<br>qPCR_mcpB_R | AATGGATGGACGCTGCACAT<br>ATCAGCTGAATGCGGTCTGG | Measure transcription of <i>mcpB</i> using quantitative PCR under different conditions and timepoints |
| qPCR_mcpI_F<br>qPCR_mcpI_R | ATGAATCTTGCCGTGGAAAA<br>TGGAGGCGCTACTATGTTT  | Measure transcription of <i>mcpI</i> using quantitative PCR under different conditions and timepoints |
| qPCR_mcpM_F<br>qPCR_mcpM_R | TAGGAATGGCAAGAGGTA<br>CTGAACAACACTGGAAC      | Measure transcription of <i>mcpM</i> using quantitative PCR under different conditions and timepoints |
| qPCR_rpoD_F<br>qPCR_rpoD_R | AGGTATCGCTGGTTTCGTTG<br>TTCGTACGCAAGAACGTCTG | Housekeeping gene for quantitative PCR experiments                                                    |

**Supplemental Table S3. Plasmids used in this study**

| Plasmids                                                          | Relevant characteristics                                                                                                                                                               | Reference           |
|-------------------------------------------------------------------|----------------------------------------------------------------------------------------------------------------------------------------------------------------------------------------|---------------------|
| <b>pMMB207 vector (p207)</b>                                      | Cm <sup>r</sup> , RSF1010 derivative, <i>IncQ lacI<sup>q</sup> Tac oriT</i>                                                                                                            | Morales et al. 1991 |
| p207:: <i>envZ</i>                                                | Cm <sup>r</sup> , pMMB207 containing the <i>envZ</i> with a His.tag at the C-terminus                                                                                                  | This study          |
| p207:: <i>envZ</i> H243A                                          | Cm <sup>r</sup> , pMMB207 containing the <i>envZ</i> H243A with a His.tag at the C-terminus                                                                                            | This study          |
| p207:: <i>ompR</i>                                                | Cm <sup>r</sup> , pMMB207 containing the <i>ompR</i> with a His.tag at the C-terminus                                                                                                  | This study          |
| p207:: <i>mcpM</i>                                                | Cm <sup>r</sup> , pMMB207 containing the <i>mcpM</i> gene with a His.tag at the C-terminus                                                                                             | This study          |
| p207:: <i>mcpM</i> R5A                                            | Cm <sup>r</sup> , pMMB207 containing the <i>mcpM</i> R5A gene with a His.tag at the C-terminus                                                                                         | This study          |
| p207:: <i>mcpM</i> E11A                                           | Cm <sup>r</sup> , pMMB207 containing the <i>mcpM</i> E11A gene with a His.tag at the C-terminus                                                                                        | This study          |
| p207:: <i>mcpM</i> V15A                                           | Cm <sup>r</sup> , pMMB207 containing the <i>mcpM</i> V15A gene with a His.tag at the C-terminus                                                                                        | This study          |
| p207:: <i>mcpM</i> S16A                                           | Cm <sup>r</sup> , pMMB207 containing the <i>mcpM</i> S16A gene with a His.tag at the C-terminus                                                                                        | This study          |
| p207:: <i>mcpM</i> V15A/S16A                                      | Cm <sup>r</sup> , pMMB207 containing the <i>mcpM</i> V15A/S16A gene with a His.tag at the C-terminus                                                                                   | This study          |
| p207:: <i>mcpM</i> G17A                                           | Cm <sup>r</sup> , pMMB207 containing the <i>mcpM</i> G17A gene with a His.tag at the C-terminus                                                                                        | This study          |
| p207:: <i>mcpM</i> G18A                                           | Cm <sup>r</sup> , pMMB207 containing the <i>mcpM</i> G18A gene with a His.tag at the C-terminus                                                                                        | This study          |
| p207:: <i>mcpM</i> G17A/G18A                                      | Cm <sup>r</sup> , pMMB207 containing the <i>mcpM</i> G17A/G18A gene with a His.tag at the C-terminus                                                                                   | This study          |
| p207:: <i>mcpM</i> G17P                                           | Cm <sup>r</sup> , pMMB207 containing the <i>mcpM</i> G17P gene with a His.tag at the C-terminus                                                                                        | This study          |
| p207:: <i>mcpM</i> G18P                                           | Cm <sup>r</sup> , pMMB207 containing the <i>mcpM</i> G18P gene with a His.tag at the C-terminus                                                                                        | This study          |
| p207:: <i>mcpM</i> N19A                                           | Cm <sup>r</sup> , pMMB207 containing the <i>mcpM</i> N19A gene with a His.tag at the C-terminus                                                                                        | This study          |
| p207:: <i>mcpM</i> G26P                                           | Cm <sup>r</sup> , pMMB207 containing the <i>mcpM</i> G26P gene with a His.tag at the C-terminus                                                                                        | This study          |
| p207:: <i>mcpM</i> G27P                                           | Cm <sup>r</sup> , pMMB207 containing the <i>mcpM</i> G27P gene with a His.tag at the C-terminus                                                                                        | This study          |
| p207:: <i>mcpM</i> S33A                                           | Cm <sup>r</sup> , pMMB207 containing the <i>mcpM</i> S33A gene with a His.tag at the C-terminus                                                                                        | This study          |
| p207:: <i>mcpM</i> G35P                                           | Cm <sup>r</sup> , pMMB207 containing the <i>mcpM</i> G35P gene with a His.tag at the C-terminus                                                                                        | This study          |
| p207:: <i>mcpM</i> A36D                                           | Cm <sup>r</sup> , pMMB207 containing the <i>mcpM</i> A36D gene with a His.tag at the C-terminus                                                                                        | This study          |
| p207:: <i>mcpM</i> R37A                                           | Cm <sup>r</sup> , pMMB207 containing the <i>mcpM</i> R37A gene with a His.tag at the C-terminus                                                                                        | This study          |
| p207:: <i>mcpM</i> G41P                                           | Cm <sup>r</sup> , pMMB207 containing the <i>mcpM</i> G41P gene with a His.tag at the C-terminus                                                                                        | This study          |
| p207:: <i>mcpM</i> C57A                                           | Cm <sup>r</sup> , pMMB207 containing the <i>mcpM</i> C57A gene with a His.tag at the C-terminus                                                                                        | This study          |
| p207:: <i>mcpM</i> C90A                                           | Cm <sup>r</sup> , pMMB207 containing the <i>mcpM</i> C90A gene with a His.tag at the C-terminus                                                                                        | This study          |
| p207:: <i>mcpM</i> C109A                                          | Cm <sup>r</sup> , pMMB207 containing the <i>mcpM</i> C109A gene with a His.tag at the C-terminus                                                                                       | This study          |
| p207:: <i>mcpM</i> C118A                                          | Cm <sup>r</sup> , pMMB207 containing the <i>mcpM</i> C118A gene with a His.tag at the C-terminus                                                                                       | This study          |
| p207:: <i>mcpM</i> Δ1-18                                          | Cm <sup>r</sup> , pMMB207 containing the mutant <i>mcpM</i> (first leader peptide sequence 1-18 deleted) gene with a His.tag at the C-terminus                                         | This study          |
| p207:: <i>mcpM</i> Δ1-36                                          | Cm <sup>r</sup> , pMMB207 containing the mutant <i>mcpM</i> (both leader peptide sequences 1-36 deleted) gene with a His.tag at the C-terminus                                         | This study          |
| p207:: <i>mcpM</i> Δ19-36                                         | Cm <sup>r</sup> , pMMB207 containing the mutant <i>mcpM</i> (secondary leader peptide sequence 19-36 deleted) with a His.tag at the C-terminus                                         | This study          |
| p207:: <i>ColV</i> <sub>1-15</sub> + <i>mcpM</i> <sub>Δ1-18</sub> | Cm <sup>r</sup> , pMMB207 containing the recombinant <i>mcpM</i> (replacement of the first leader peptide sequence 1-18 by colicin V leader sequence) with a His.tag at the C-terminus | This study          |
| <b>pCR2.1-TOPO vector (pCR)</b>                                   | Amp <sup>r</sup> , cloning vector                                                                                                                                                      | Invitrogen          |
| pCR:: <i>Pmic+mcpM</i>                                            | Amp <sup>r</sup> , pCR2.1 containing the <i>mcpM</i> gene with a His.tag at the C-terminus under the endogenous promoter control                                                       | This study          |
| <b>pPAL7 vector (pPAL)</b>                                        | Amp <sup>r</sup> , a T7-based expression vector with an N-terminal Profinity eXact tag                                                                                                 | Bio-Rad             |
| pPAL7- <i>ompR</i>                                                | Amp <sup>r</sup> , pPAL7 containing the <i>ompR</i>                                                                                                                                    | This study          |
| pPAL7- <i>ompR</i> D55A                                           | Amp <sup>r</sup> , pPAL7 containing the <i>ompR</i> D55A                                                                                                                               | This study          |



|                             |                                                                                                                  |                   |
|-----------------------------|------------------------------------------------------------------------------------------------------------------|-------------------|
| pPAL7- <i>XRE</i>           | Amp <sup>r</sup> , pPAL7 containing the <i>XRE</i>                                                               | This study        |
| <b>pDM4 vector</b>          | Cm <sup>r</sup> , Suicide vector with an R6K origin (pir-requiring) and <i>sacBR</i> of <i>Bacillus subtilis</i> | Milton et al.1996 |
| pDM4- $\Delta envZ$ (A1+A2) | Cm <sup>r</sup> , pDM4 containing the flanking region sequences of <i>envZ</i>                                   | This study        |
| pDM4- $\Delta ompR$ (A1+A2) | Cm <sup>r</sup> , pDM4 containing the flanking region sequences of <i>ompR</i>                                   | This study        |
| pDM4- $\Delta mcpM$ (A1+A2) | Cm <sup>r</sup> , pDM4 containing the flanking region sequences of <i>mcpM</i>                                   | This study        |
| pDM4- $\Delta mcpB$ (A1+A2) | Cm <sup>r</sup> , pDM4 containing the flanking region sequences of <i>mcpB</i>                                   | This study        |
| pDM4- $\Delta mcpD$ (A1+A2) | Cm <sup>r</sup> , pDM4 containing the flanking region sequences of <i>mcpD</i>                                   | This study        |
| pDM4- $\Delta dsbA$ (A1+A2) | Cm <sup>r</sup> , pDM4 containing the flanking region sequences of <i>dsbA</i>                                   | This study        |
| pDM4- $\Delta dsbB$ (A1+A2) | Cm <sup>r</sup> , pDM4 containing the flanking region sequences of <i>dsbB</i>                                   | This study        |
| pDM4- $\Delta dsbD$ (A1+A2) | Cm <sup>r</sup> , pDM4 containing the flanking region sequences of <i>dsbD</i>                                   | This study        |

## References:

- Sawant AA, Casavant NC, Call DR, Besser TE.** 2011. Proximity-dependent inhibition in *Escherichia coli* isolates from cattle. *Appl Environ Microbiol* **77**:2345-2351.
- Baba T, Ara T, Hasegawa M, Takai Y, Okumura Y, Baba M, Datsenko KA, Tomita M, Wanner BL, Mori H.** 2006. Construction of *Escherichia coli* K-12 in-frame, single-gene knockout mutants: the Keio collection. *Mol Syst Biol.* **2**: 2006.0008.
- Eberhart LJ, Ochoa JN, Besser TE, Call DR.** 2014. Microcin MccPDI reduces the prevalence of susceptible *Escherichia coli* in neonatal calves. *J Appl Microbiol.* **117(2)**:340-6.
- Eberhart LJ, Deringer JR, Brayton KA, Sawant AA, Besser TE, Call DR.** 2012. Characterization of a novel microcin that kills enterohemorrhagic *Escherichia coli* O157:H7 and O26. *Appl Environ Microbiol* **78**:6592-6599.
- Zhao Z, Eberhart LJ, Orfe LH, Lu SY, Besser TE, Call DR.** 2015. Genome-Wide Screening Identifies Six Genes That Are Associated with Susceptibility to *Escherichia coli* Microcin PDI. *Appl Environ Microbiol* **81**:6953-6963.
- Simon R, Prierer U, Pühler A.** 1983. A Broad Host Range Mobilization System for *In Vivo* Genetic Engineering: Transposon Mutagenesis in Gram Negative Bacteria. *Nat Biotechnol* **1**:784–791.
- Morales VM, Backman A, Bagdasarian M.** 1991. A series of wide-host-range low-copy-number vectors that allow direct screening for recombinants. *Gene* **97**: 39–47.
- Valdivia RH, Falkow S.** 1996. Bacterial genetics by flow cytometry: rapid isolation of *Salmonella typhimurium* acid-inducible promoters by differential fluorescence induction. *Mol Microbiol.* **22(2)**:367-78.
- Milton DL, O'Toole R, Horstedt P, Wolf-Watz H.** 1996. Flagellin A is essential for the virulence of *Vibrio anguillarum*. *J Bacteriol* **178**: 1310–1319.
- Bland DM, Eisele NA, Keleher LL, Anderson PE, Anderson DM.** 2011. Novel genetic tools for diaminopimelic acid selection in virulence studies of *Yersinia pestis*. *PLoS One.* **6(3)**:e17352.
